# Supplementary material
Source: PubMed Central journal article supplement (PMC9328700)
Supplement: PatilSupp.pdf [file PatilSupp.pdf]

## Supplemental material for

Lin Y, Saper R, Patil S. Long COVID shared medical appointments: lifestyle and mind-body medicine with peer support. *Ann Fam Med*. 2022;20:Online. <https://doi.org/10.1370/afm.2817>

## REFERENCES

1. Menges D, Ballouz T, Anagnostopoulos A, et al. Burden of post-COVID-19 syndrome and implications for healthcare service planning: A population-based cohort study. *PLoS One*. 2021;16(7): e0254523-e0254523. [10.1371/journal.pone.0254523](https://doi.org/10.1371/journal.pone.0254523)
2. Kondratiuk AL, Pillay TD, Kon OM, Lalvani A. A conceptual framework to accelerate the clinical impact of evolving research into long COVID. *Lancet Infect Dis*. 2021;21(6):756-757. [10.1016/S1473-3099\(21\)00136-5](https://doi.org/10.1016/S1473-3099(21)00136-5)
3. Staudt A, Jörres RA, Hinterberger T, Lehnen N, Loew T, Budweiser S. Associations of post-acute COVID syndrome with physiological and clinical measures 10 months after hospitalization in patients of the first wave. *Eur J Intern Med*. 2022;95:50-60. [10.1016/j.ejim.2021.10.031](https://doi.org/10.1016/j.ejim.2021.10.031)
4. Morin L, Savale L, Pham T, et al; Writing committee for the COMEBAC Study Group. Four-Month clinical status of a cohort of patients after hospitalization for COVID-19. *JAMA*. 2021;325(15):1525-1534. [10.1001/jama.2021.3331](https://doi.org/10.1001/jama.2021.3331)
5. Calabrese LH. Cytokine storm and the prospects for immunotherapy with COVID-19. *Cleve Clin J Med*. 2020;87(7):389-393. [10.3949/ccjm.87a.ccc008](https://doi.org/10.3949/ccjm.87a.ccc008)
6. Furman D, Campisi J, Verdin E, et al. Chronic inflammation in the etiology of disease across the life span. *Nature Medicine*. 2019;25(12):1822-1832. [10.1038/s41591-019-0675-0](https://doi.org/10.1038/s41591-019-0675-0)
7. Van de Vyver J, Leite AC, Alwan NA. Navigating the social identity of long covid. *BMJ*. 2021;375(2933): n2933. [10.1136/bmj.n2933](https://doi.org/10.1136/bmj.n2933)
8. Zabetakis I, Lordan R, Norton C, Tsoupras A. COVID-19: The inflammation link and the role of nutrition in potential mitigation. *Nutrients*. 2020;12(5):1466. [10.3390/nu12051466](https://doi.org/10.3390/nu12051466)
9. Moludi J, Qaisar SA, Alizadeh M, et al. The relationship between Dietary Inflammatory Index and disease severity and inflammatory status: a case-control study of COVID-19 patients. *Br J Nutr*. 2022; 127(5):773-781. [10.1017/S0007114521003214](https://doi.org/10.1017/S0007114521003214)
10. Irwin MR. Sleep and inflammation: partners in sickness and in health. *Nature Reviews Immunology*. 2019/11/01 2019;19(11):702-715. [10.1038/s41577-019-0190-z](https://doi.org/10.1038/s41577-019-0190-z)

## **Supplemental Appendix. Sleep hygiene Instructions**

Good sleep habits, also called good sleep hygiene, are practices to help you get enough quality sleep.

Do:

- Have a sleep schedule: Go to sleep and wake up around the same time every day, even on weekends and vacations.
- Clear your mind before bed: Make a to-do list early in the evening, so you won't stay awake in bed and worry about the next day.
- Create a good sleep environment: Make sure your bed and pillows are comfortable. Turn down the lights and avoid loud sounds. Keep the room at a comfortable temperature.
- Exercise every day: Stay active but try to avoid exercising during the few hours right before bed.
- Relax: Before bed, take a warm bath, read, or do another relaxing activity.
- See your healthcare provider: If you've been having trouble sleeping or feel extra drowsy during the day, talk to your provider. There are many treatments available for sleep disorders.

Don't:

- Consume caffeine, nicotine, and alcohol late in the day: These substances can interfere with your ability to fall and stay asleep.
- Lie in bed awake: It's better to do a soothing activity, like reading, until you feel tired.
- Nap during the day: A short nap (less than 30 minutes) is OK if you're very sleepy. But try to avoid naps after 3 p.m.
- Think negative thoughts: Try to avoid a negative mindset when going to bed, such as, "If I don't get enough sleep now, I won't get through my day tomorrow!"

- Use electronics right before bed: Electronics, such as your phone or tablet, can interfere with your body's production of melatonin. This hormone gets released before bedtime to help you easily fall asleep.
